# Supplementary material for: RNA Directed Modulation of Phenotypic Plasticity in Human Cells
Source: PubMed Central journal article supplement (PMC4833343; doi:10.1371/journal.pone.0152424), 2016-04-15
Supplement: pone.0152424.s009.pdf [file pone.0152424.s009.pdf]

**S4 Table Retro-EIF2S2 and Retro-Cox6a homologous region in protein-coding gene counterparts.** The locus of the protein-coding gene counterpart and biological function are shown.

| <b>Retrogene</b> | <b>Protein-coding locus</b> | <b>Function of protein coding gene</b>                                                                                                                                                                | <b>Locus</b>                  |
|------------------|-----------------------------|-------------------------------------------------------------------------------------------------------------------------------------------------------------------------------------------------------|-------------------------------|
| Retro_Cox6a      | Cox6A                       | Cytochrome c oxidase (COX), the terminal enzyme of the mitochondrial respiratory chain, catalyzes the electron transfer from reduced cytochrome c to oxygen                                           | chr12:120,878,423-120,878,529 |
| Retro	EIF2S2     | EIF2S2                      | Eukaryotic translation initiation factor 2 (EIF-2) functions in the early steps of protein synthesis by forming a ternary complex with GTP and initiator tRNA and binding to a 40S ribosomal subunit. | chr6:121,102,194-121,103,413  |
